# Supplementary material for: Cytotoxic Staphylococcus aureus PSMα3 inhibits the aggregation of human insulin in vitro
Source: Royal Society of Chemistry journal article supplement (doi:10.1039/d4cp00669k), 2024-01-01
Supplement: d4cp00669k1.pdf [file d4cp00669k1.pdf]

## Supplemental Information

### The cytotoxic *Staphylococcus aureus* PSM $\alpha$ 3 inhibits the aggregation of human insulin *in vitro*

Aleksandra Kalitnik, Monika Szefczyk, Alicja W. Nowakowska, Jakub W. Wojciechowski, Marlena Gąsior-Głogowska, Joanna Olesiak-Bańska, Małgorzata Kotulska

| Content                                                                                                                                                    | Page number |
|------------------------------------------------------------------------------------------------------------------------------------------------------------|-------------|
| <b>Table S1</b> PSM $\alpha$ 3 peptide analytical data                                                                                                     | S2          |
| <b>Fig. S1</b> Analytical HPLC chromatogram of PSM $\alpha$ 3                                                                                              | S2          |
| <b>Fig. S2</b> Mass spectrum of PSM $\alpha$ 3                                                                                                             | S2          |
| <b>Fig. S3</b> Raw FTIR spectra of PSM $\alpha$ 3                                                                                                          | S3          |
| <b>Fig. S4</b> AFM images of monomerized freshly dissolved insulin and PSM $\alpha$ 3                                                                      | S3          |
| <b>Fig. S5</b> AFM images of PSM $\alpha$ 3 before and after incubation without pre-treatment for monomerization                                           | S4          |
| <b>Fig. S6</b> AFM images of PSM $\alpha$ 3 after incubation for 72 h at 37 °C under different experimental conditions                                     | S4          |
| <b>Fig. S7</b> ThT aggregation kinetics of insulin incubated for 72 h at 37 °C alone and co-incubated with PSM $\alpha$ 3 in different concentrations      | S4          |
| <b>Fig. S8</b> Log (half time) ~ log(concentration) plot for insulin and for insulin + PSM $\alpha$ 3                                                      | S5          |
| <b>Fig. S9</b> AFM images of insulin after incubation alone and with PSM $\alpha$ 3 in different concentrations                                            | S5          |
| <b>Fig. S10</b> Raw FTIR spectra of insulin, freshly dissolved after incubation alone and with PSM $\alpha$ 3                                              | S6–S7       |
| <b>Fig. S11</b> Visualization of molecular details of residue-residue contacts in the structure of PSM $\alpha$ 3 docked to experimental insulin structure | S8          |

**Table S1** PSM $\alpha$ 3 peptide analytical data.

| Name           | Sequence                   | Formula                                                             | Mass        |          | Analytical HPLC         |        |        |
|----------------|----------------------------|---------------------------------------------------------------------|-------------|----------|-------------------------|--------|--------|
|                |                            |                                                                     | theoretical | observed | t <sub>ret.</sub> [min] |        |        |
| PSM $\alpha$ 3 | MEFVAKLFKFFKDL<br>LGKFLGNN | C <sub>127</sub> H <sub>193</sub> N <sub>29</sub> O <sub>28</sub> S | [(M+2H)/2]  | 1304.57  | [(M+2H)/2]              | 15.213 |        |
|                |                            |                                                                     | [(M+3H)/3]  | 870.05   | [(M+3H)/3]              |        | 870.15 |
|                |                            |                                                                     | [(M+4H)/4]  | 652.79   | [(M+4H)/4]              |        | 652.87 |

**<Chromatogram>**

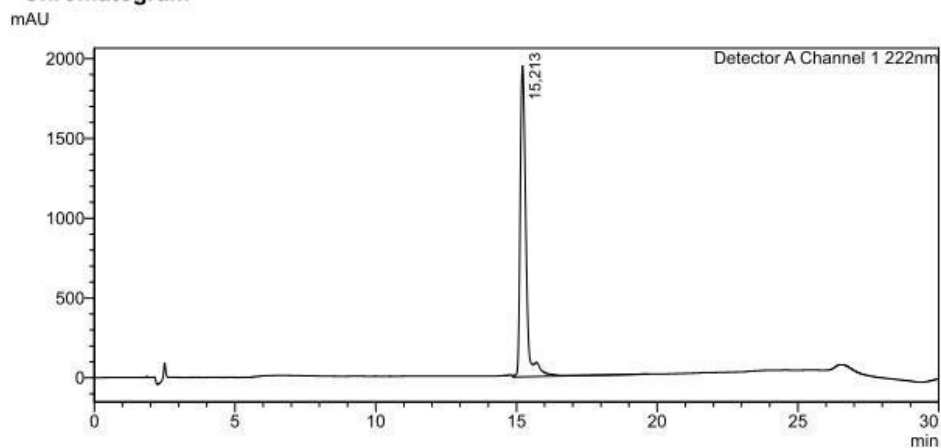

**Fig. S1** Analytical RP-HPLC chromatogram of PSM $\alpha$ 3.

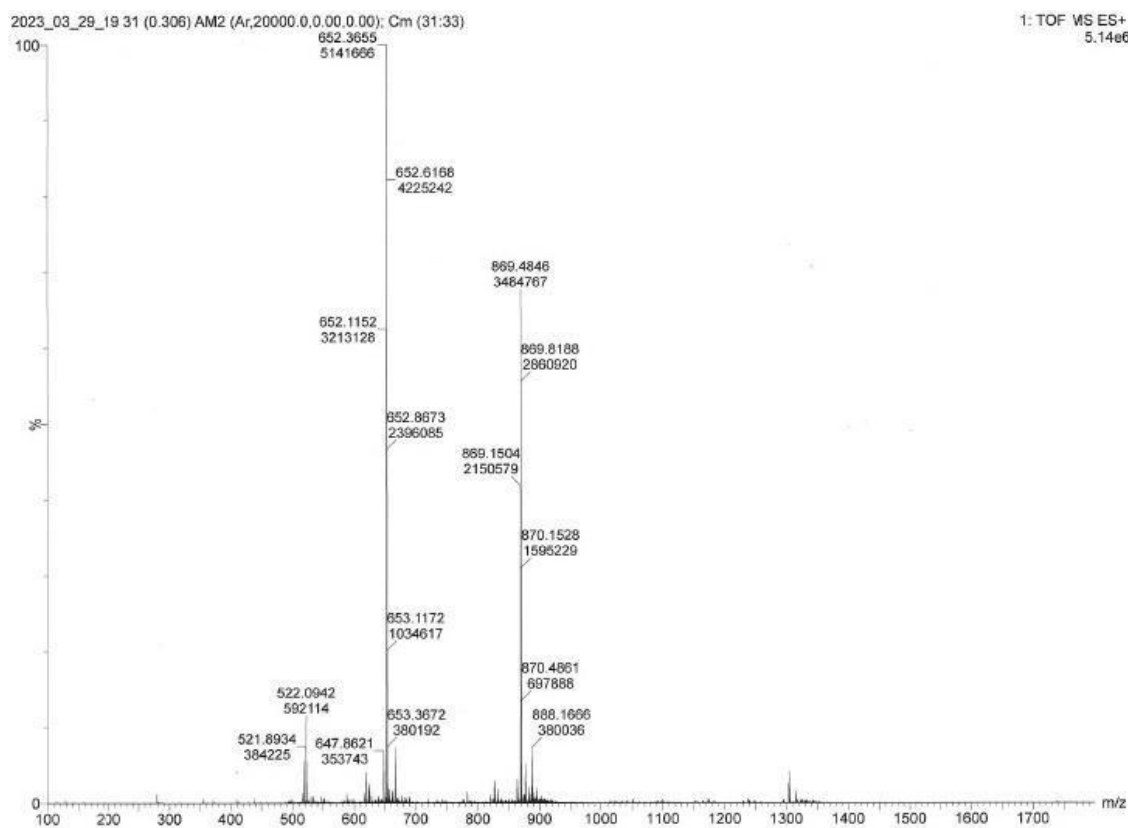

**Fig. S2** Mass spectrum of PSM $\alpha$ 3.

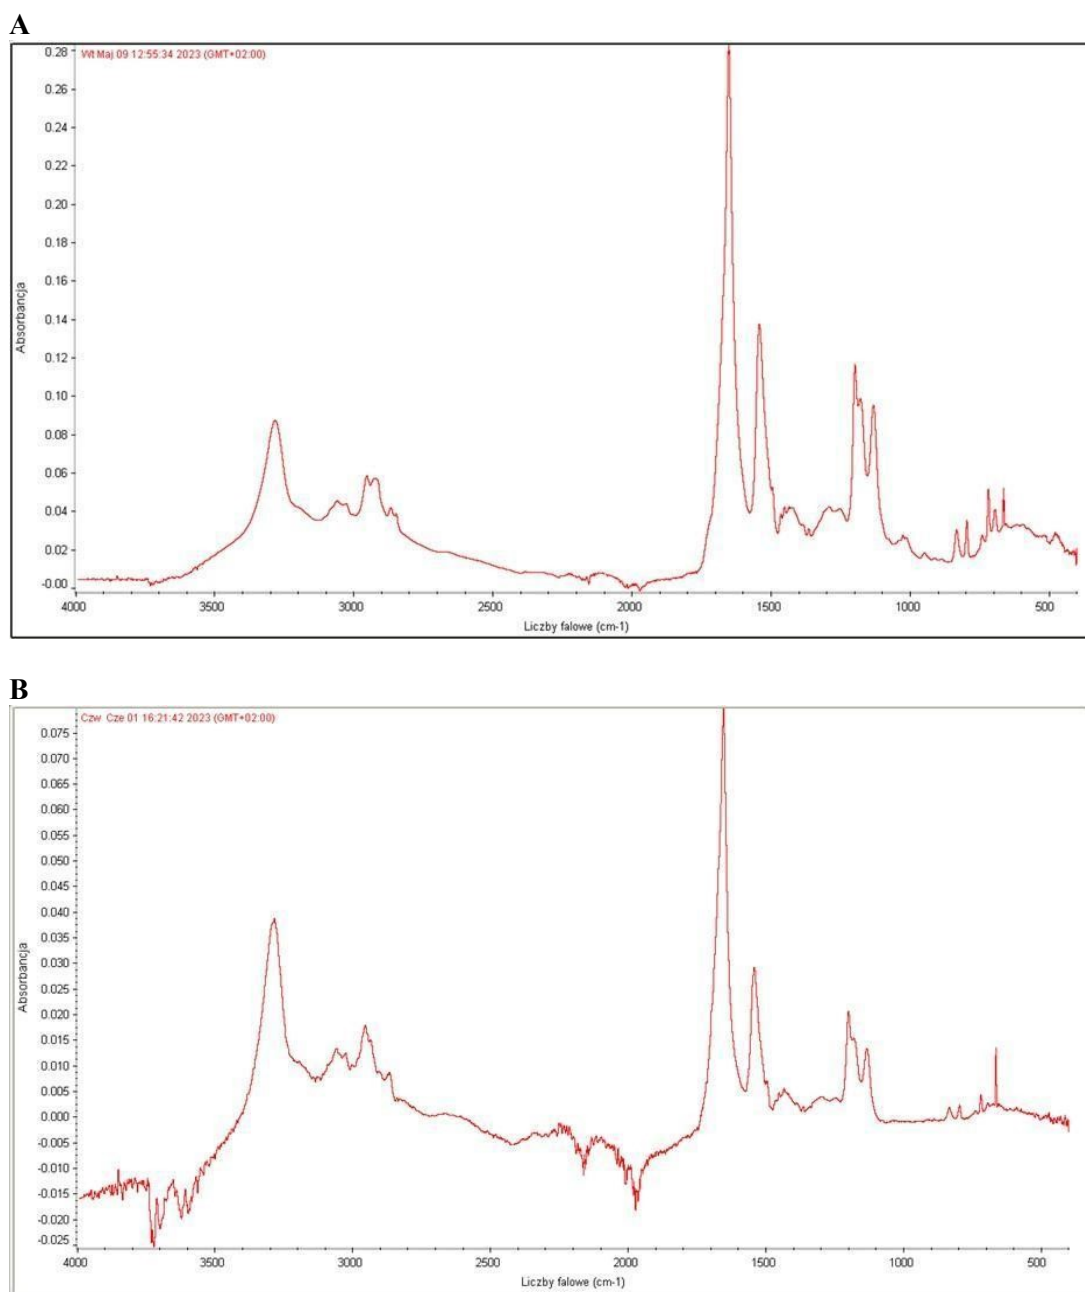

**Fig. S3** Raw FTIR spectra of monomerized PSM $\alpha$ 3 (**A**) before, and (**B**) after incubation for 72 h at 37°C.

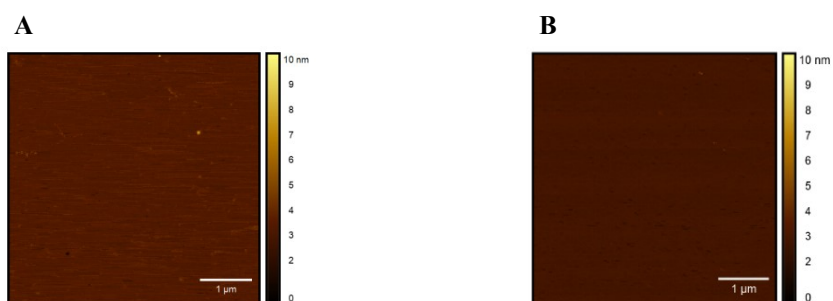

**Fig. S4** AFM images of monomerized insulin (**A**) and PSM $\alpha$ 3 (**B**) freshly dissolved in water before starting the aggregation assay. Peptide concentrations are equal to 0.5 mg/mL.

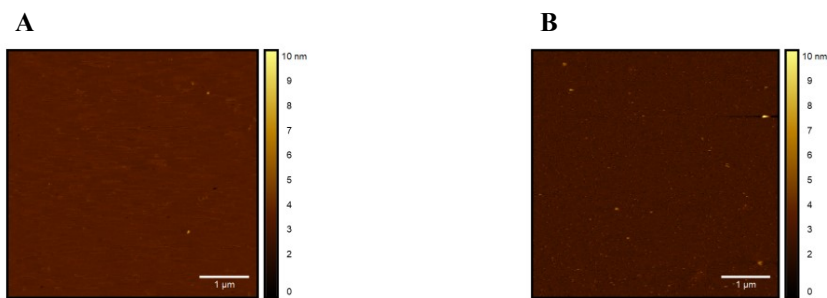

**Fig. S5** AFM images of PSM $\alpha$ 3 freshly dissolved in water (A) and after incubation for 72 h at 37 °C (B) without HFIP pre-treatment for monomerization.

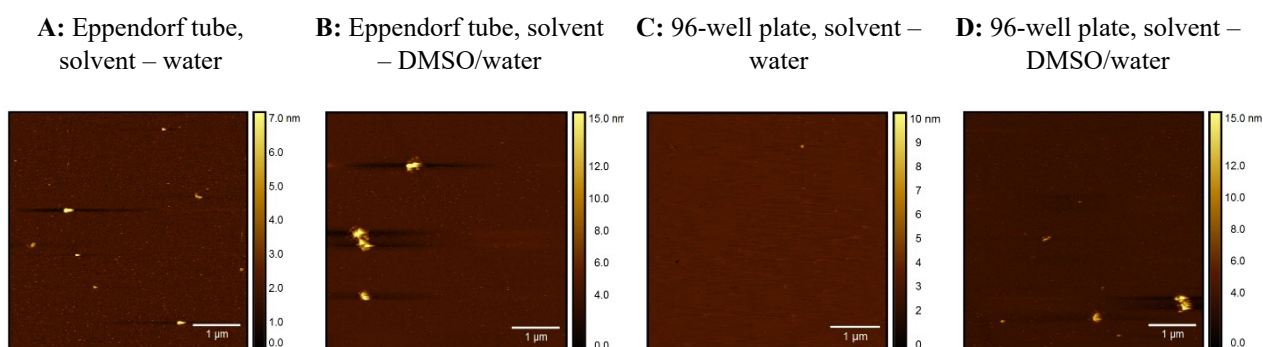

**Fig. S6** AFM images of PSM $\alpha$ 3 after incubation for 72 h at 37 °C: (A and B) in Eppendorf tubes and (C and D) in a 96-well plate; (A and C) the peptide was dissolved purely in water; (B and D) peptide was dissolved in DMSO and then diluted with water.

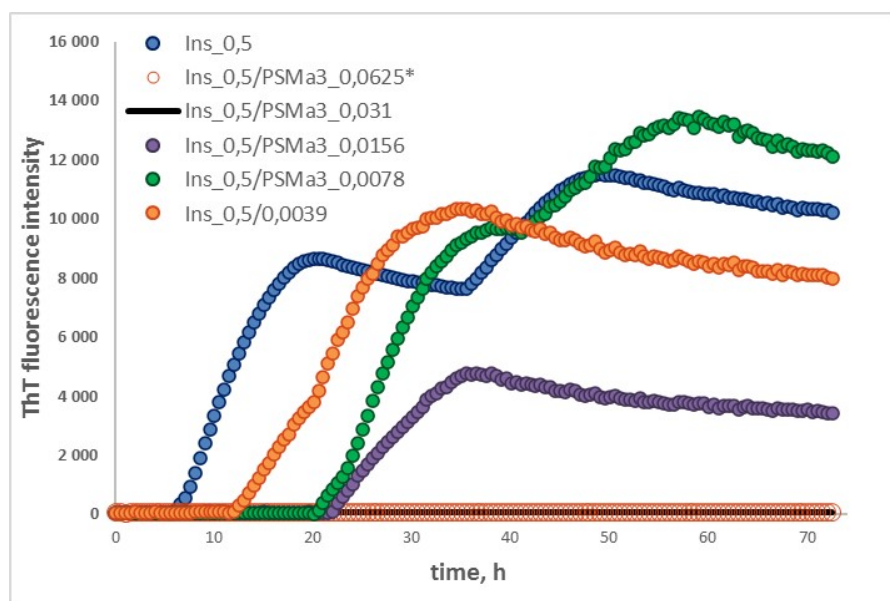

**Fig. S7** ThT aggregation kinetics of insulin incubated for 72 h at 37 °C alone and co-incubated with PSM $\alpha$ 3 in different concentrations. \* There is also a full inhibition (no ThT fluorescence increase) observed in the concentrations of PSM $\alpha$ 3 0.125; 0.25, and 0.5 mg/mL per 0.5 mg/mL of Insulin.

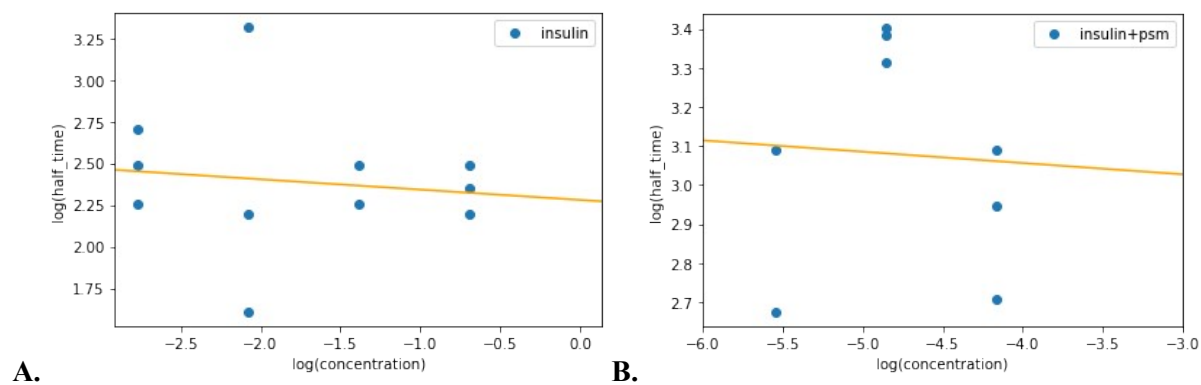

**Fig. S8** Log(half time)~log(concentration) plot **A)** for insulin and **B)** for insulin+PSM $\alpha$ 3

**A:** Ins\_0.5mg/mL/  
PSM $\alpha$ 3\_0.5mg/mL

**B:** Ins\_0.5mg/mL/  
PSM $\alpha$ 3\_0.25mg/mL

**C:** Ins\_0.5mg/mL/  
PSM $\alpha$ 3\_0.125mg/mL

**D:** Ins\_0.5mg/mL/  
PSM $\alpha$ 3\_0.0625mg/mL

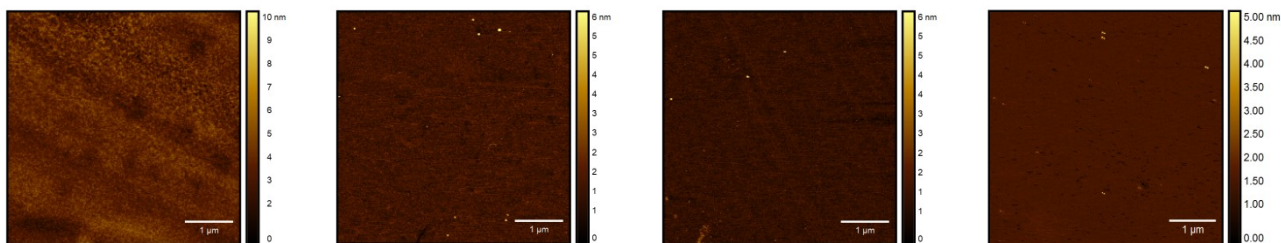

**Fig. S9** AFM images of insulin after incubation alone and with PSM $\alpha$ 3 in different concentrations.

**A**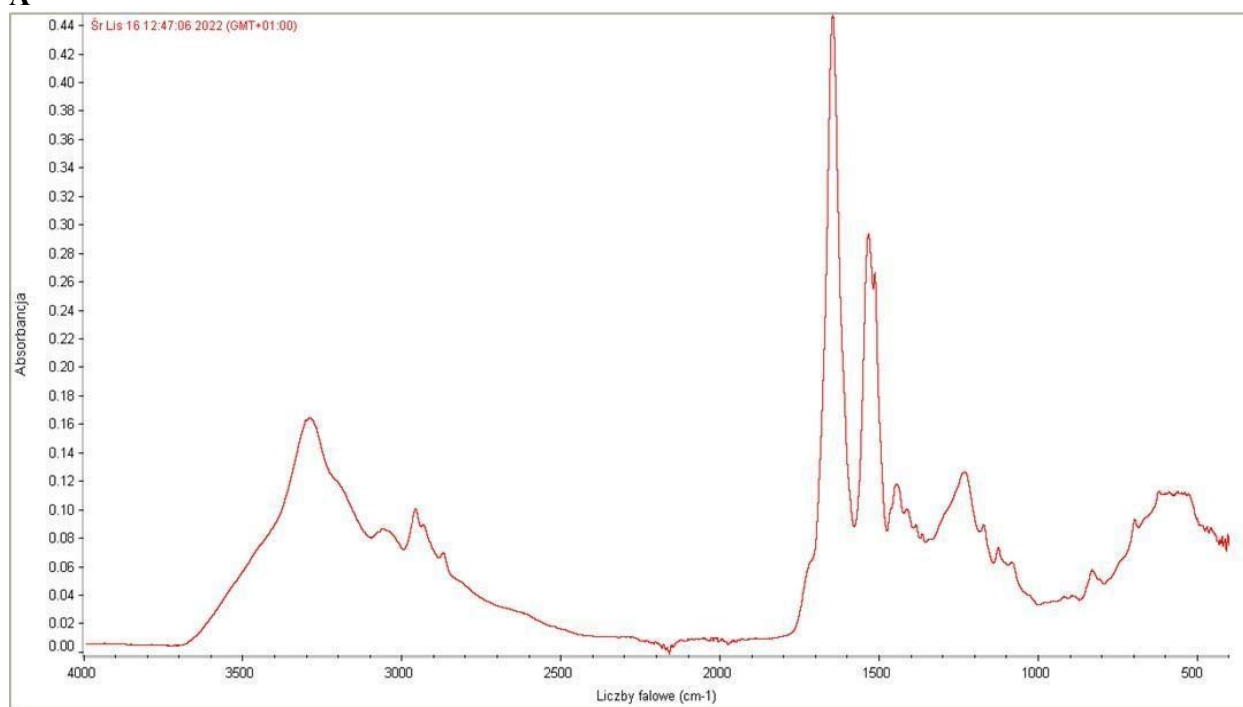**B**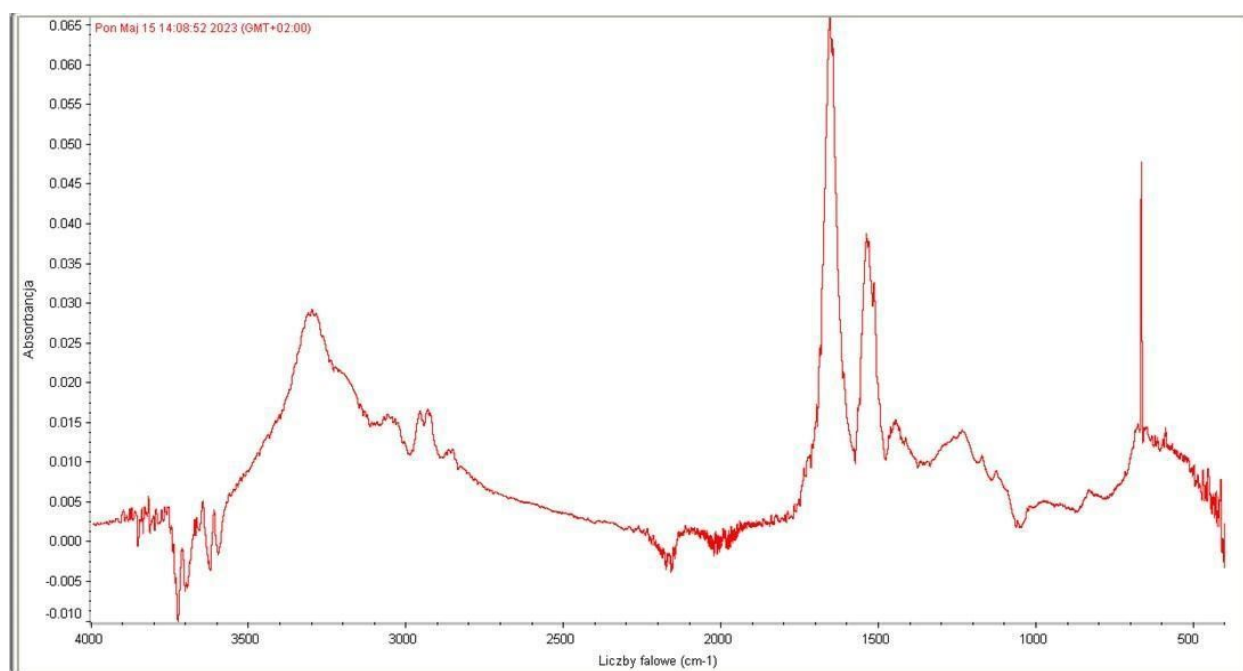

**C**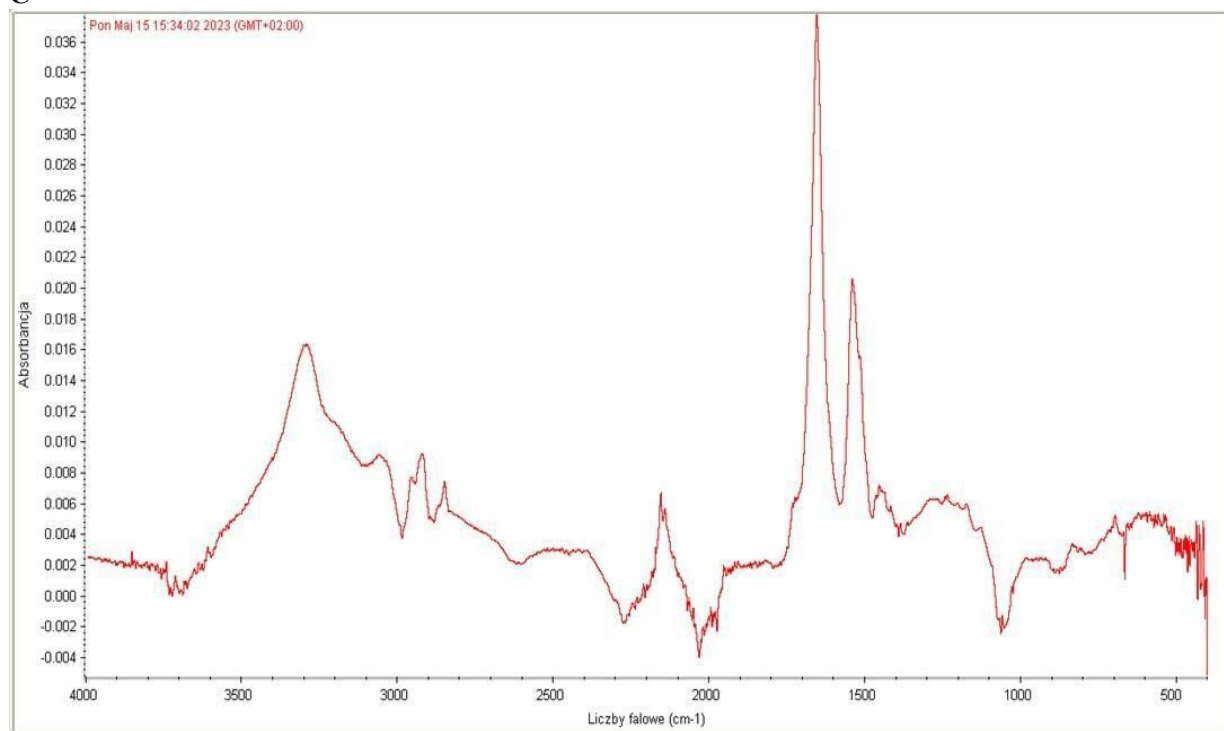

**Fig. S10** Raw FTIR spectra of insulin in a concentration of 0.5 mg/mL, freshly dissolved (**A**) and after incubation for 72 h at 37 °C, alone (**B**) and with PSM $\alpha$ 3 at 0.031 mg/mL (**C**)

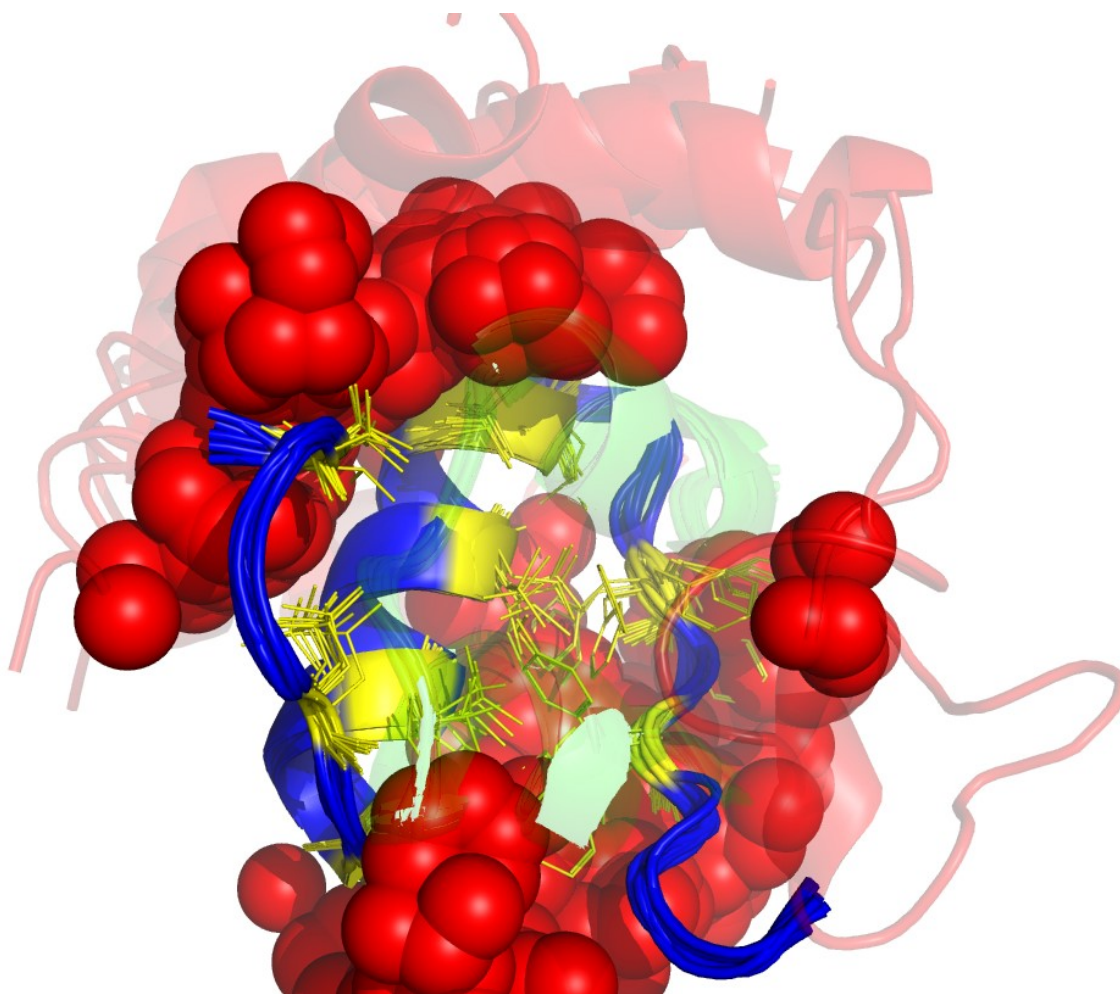

**Fig. S11.** Visualisation of molecular details of residue-residue contacts in the structure of PSM $\alpha$ 3 docked to the experimental insulin structure. Insulin chain A is depicted in green, chain B in blue and PSM $\alpha$ 3 in red. Insulin residues involved in contacts are highlighted in yellow, with sticks representing atomistic details of the contacts, and red balls represent atoms in PSM $\alpha$ 3 which are involved in the contacts.
